# Supplementary material for: Enhanced adsorption capacity of activated carbon over thermal oxidation treatment for methylene blue removal: kinetics, equilibrium, thermodynamic, and reusability studies
Source: Royal Society of Chemistry journal article supplement (doi:10.1039/d2ra06481b), 2022-12-21
Supplement: d2ra06481b1.pdf [file d2ra06481b1.pdf]

## Supplementary Materials

### Enhanced Adsorption Capacity of Activated Carbon over Thermal Oxidation Treatment for Methylene Blue Removal: Kinetic, Equilibrium, Thermodynamic, and Reusability Studies

*Irwan Kurnia\**<sup>a, b</sup>, *Surachai Karnjanakom*<sup>c</sup>, *Irkham Irkham*<sup>a, b</sup>, *Haryono Haryono*<sup>a</sup>, *Yohanes Andre Situmorang*<sup>d</sup>, *Antonius Indarto*<sup>d, e</sup>, *Atiek Rostika Noviyanti*<sup>a</sup>, *Yeni Wahyuni Hartati*<sup>a</sup>,  
*Guoqing Guan*<sup>f</sup>

<sup>a</sup> *Department of Chemistry, Faculty of Mathematics and Natural Sciences, Universitas Padjadjaran, Jl. Raya Bandung – Sumedang KM. 21 Jatinangor, Sumedang 45363, Indonesia*

<sup>b</sup> *Study Center of Natural Resources, Energy and Environmental Engineering, Universitas Padjadjaran, Jl. Raya Bandung – Sumedang KM. 21 Jatinangor, Sumedang 45363, Indonesia*

<sup>c</sup> *Department of Chemistry, Faculty of Science, Rangsit University, Pathumthani 1200, Thailand*

<sup>d</sup> *Department of Bioenergy Engineering and Chemurgy, Institut Teknologi Bandung, Jl. Let. Jen. Purn. Dr. (HC). Mashudi No. 1, Sumedang 45363, Indonesia*

<sup>e</sup> *Department of Chemical Engineering, Institut Teknologi Bandung, Jl. Ganesha 10, Bandung 40132, Indonesia*

<sup>f</sup> *Institute of Regional Innovation, Hirosaki University, 3-Bunkyochō, Hirosaki 036-8561, Japan*

\*Corresponding author.

E-mail address: [irwan.kurnia@unpad.ac.id](mailto:irwan.kurnia@unpad.ac.id) ([I. Kurnia](#))

Table S1. Linear and non-linear equations of kinetics and isotherm models

| No              | Model            | Non-linear equation                                  | Linear equation                                                            |
|-----------------|------------------|------------------------------------------------------|----------------------------------------------------------------------------|
| <u>Kinetic</u>  |                  |                                                      |                                                                            |
| S1              | PFO              | $q_t = q_e(1 - \exp^{-k_1 t})$                       | $\log(q_e - q_t) = \log q_e - \frac{k_1}{2.303} t$                         |
| S2              | PSO              | $q_t = \frac{k_2 q_e^2 t}{1 + k_2 q_e t}$            | $\frac{t}{q_t} = \frac{1}{k_2 q_e^2} + \frac{1}{q_e} t$                    |
| S3              | ID-WM            | $q_t = q_e(1 - \exp^{-k_{ip} t})$                    |                                                                            |
| <u>Isotherm</u> |                  |                                                      |                                                                            |
| S4              | Langmuir         | $q_e = \frac{q_e K_L C_e}{1 + K_L C_e}$              | $\frac{C_e}{q_e} = \frac{1}{q_{max} K_L} + \frac{1}{q_{max}} C_e$          |
| S5              | Freundlich       | $q_e = K_F C_e^{1/n}$                                | $\log q_e = \log K_F + \frac{1}{n} \log C_e$                               |
| S6              | Redlich-Peterson | $q_e = \frac{K_{RP} C_e}{1 + \alpha_{RP} C_e^\beta}$ | $\ln\left(\frac{K_{RP}}{q_e} - 1\right) = \ln \alpha_{RP} + \beta \ln C_e$ |
| S7              | Temkin           | $q_e = \frac{RT}{H_{ads}} \ln(K_T C_e)$              | $q_e = \frac{RT}{H_{ads}} \ln(K_T) + \frac{RT}{H_{ads}} \ln(C_e)$          |

$q_e$  and  $q_t$  ( $\text{mg g}^{-1}$ ) are the amounts of adsorbate at equilibrium and at time  $t$ , respectively;  $k_1$  ( $\text{min}^{-1}$ ) is the pseudo-first-order rate constants and  $k_2$  ( $\text{mg g}^{-1} \text{min}^{-1}$ ) are the pseudo-first-order and the pseudo-second-order rate constants;  $k_{ip}$  ( $\text{mg g}^{-1} \text{min}^{1/2}$ ) is the interparticle diffusion Weber-Morris rate constant;  $C_e$  ( $\text{mg L}^{-1}$ ) is the equilibrium concentration of the adsorbate;  $q_{max}$  ( $\text{mg g}^{-1}$ ) is the Langmuir maximum adsorption capacity of adsorbate per unit mass of adsorbent;  $K_L$  ( $\text{L mg}^{-1}$ ) is the Langmuir constant related to the adsorption equilibrium;  $K_F$  ( $\text{mg g}^{-1} (\text{L mg}^{-1})^{1/n}$ ) is the Freundlich constant related to the adsorption capacity;  $n$  (dimensionless) is the intensity of adsorption and constants incorporating the factors affecting the adsorption capacity;  $K_{RP}$  ( $\text{L g}^{-1}$ )

and  $\alpha_{RP}$  ( $L\ mg^{-1}$ ) are Redlich-Peterson model constants;  $\beta$  is the exponent in between of 0 and 1;  
 $K_T$  ( $L/g$ ) is Temkin constants;  $H_{ads}$  ( $J/mol$ ) is enthalpy of adsorption.

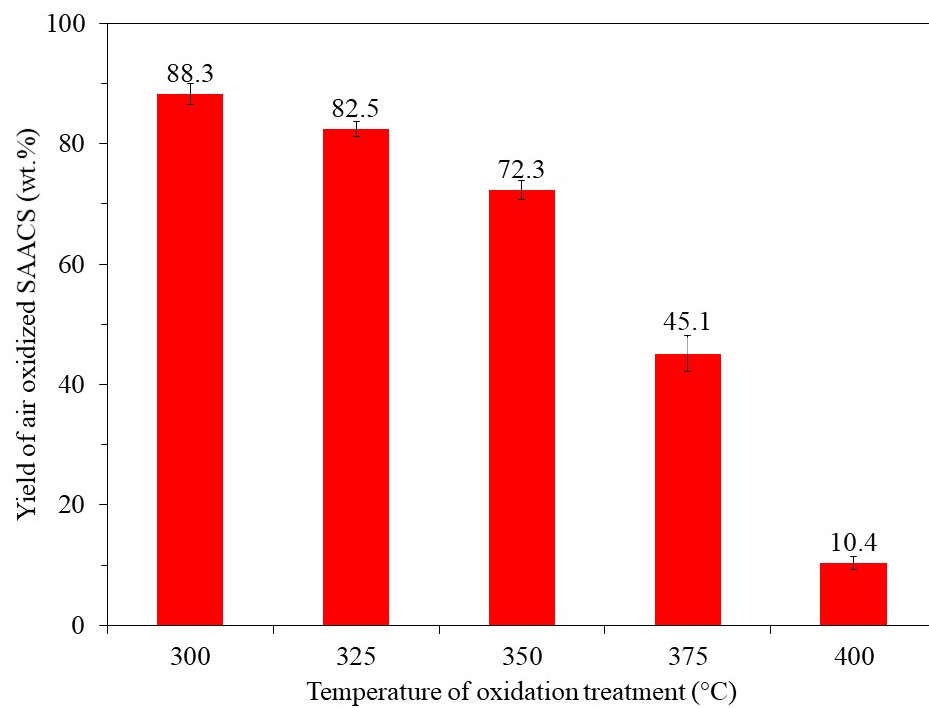

Fig. S1. The yield of air oxidized SACCS (SACCS-X) at different final temperatures.

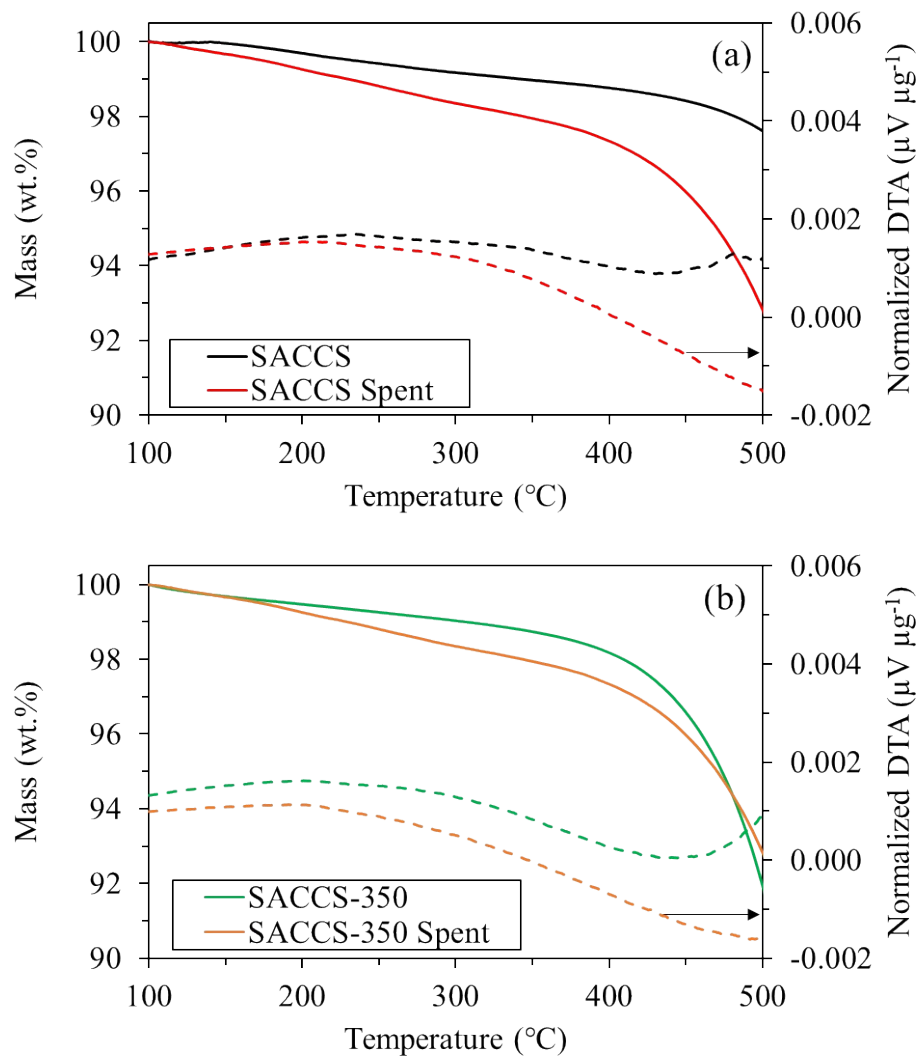

Fig. S2. TGA-DTA profiles of adsorbents. (a) SACCS and SACCS Spent; (b) SACCS-350 and SACCS-350 Spent.

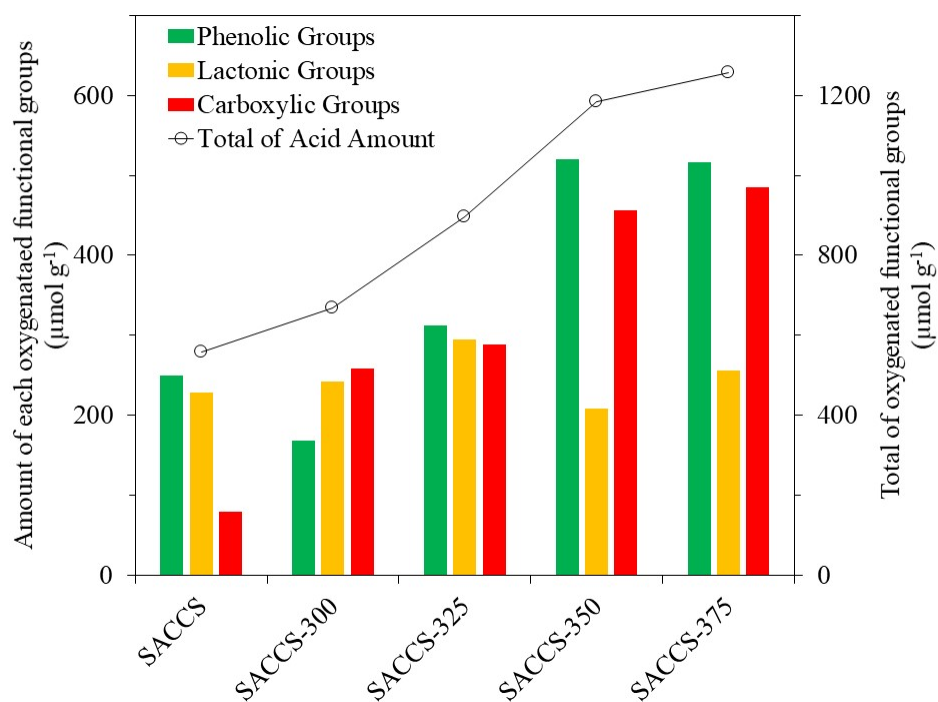

Fig. S3. The amounts of each oxygenated functional groups on SACCS and air oxidized SACCS-X.

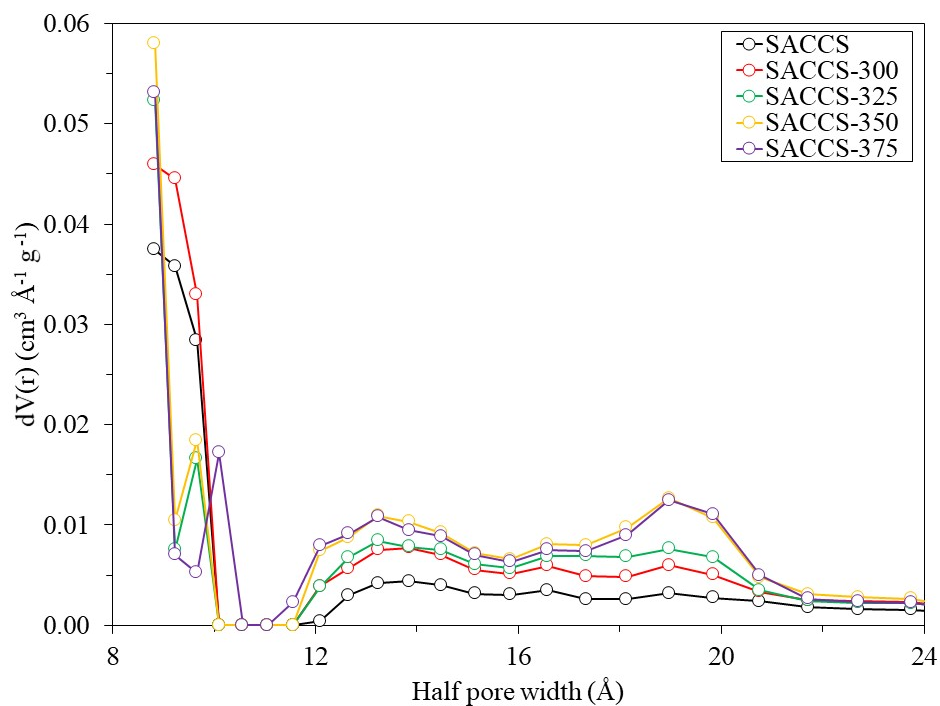

Fig. S4. Pore size distributions of the SACCS and air oxidized SACCS-X.

Pore size distribution was determined by NLDFIT with slit pore model for carbon materials. The determination models of  $N_2$  adsorption isotherms were measured at 77 K in the range of relative pressure of  $P/P_0 = 0.01-1.00$ .

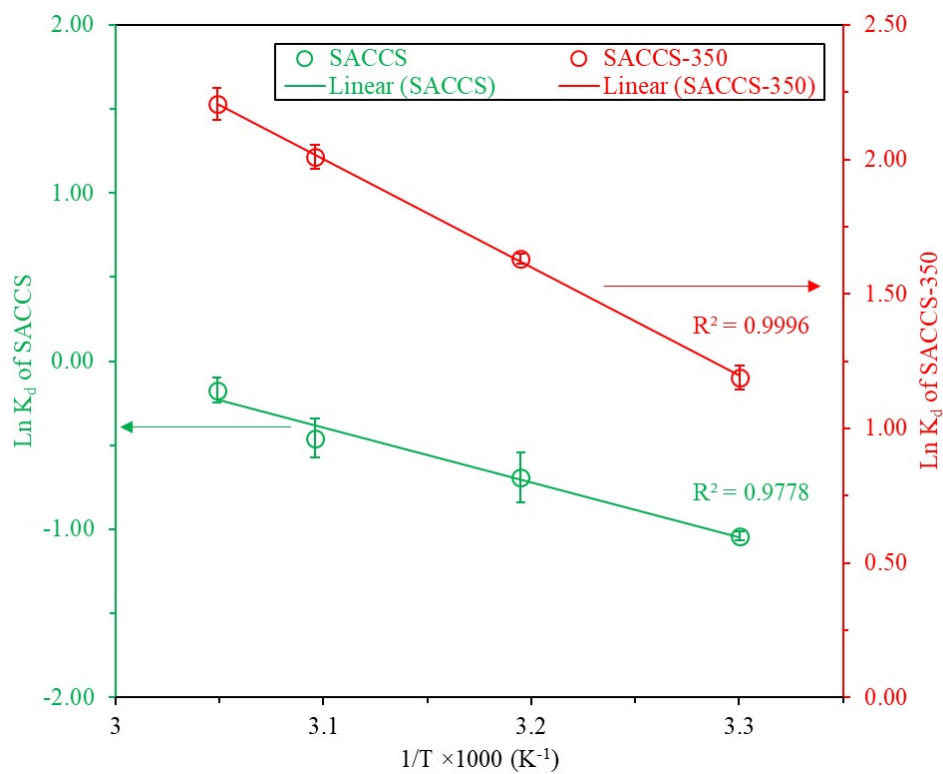

Fig. S5.  $\ln K_d$  vs  $1000 T^{-1}$  plot for thermodynamic parameter determinations of SACCS and SACCS-350. Adsorbent = 15 mg, MB = 100 mg  $L^{-1}$ , 500 rpm, 180 min.



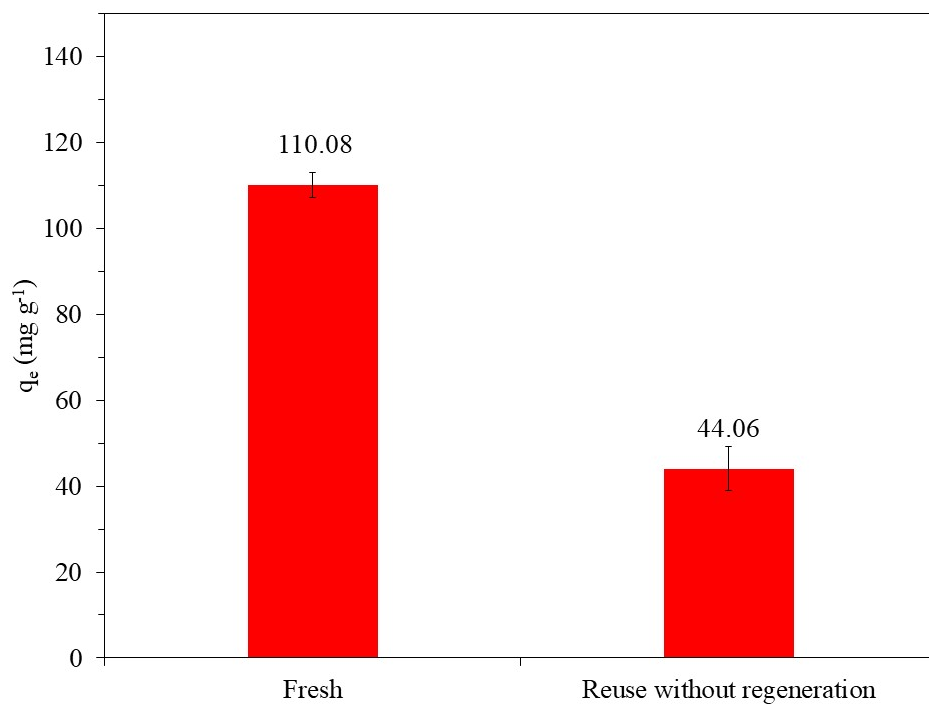

Fig. S6. Reusability of SACCS-350 without a regeneration process. Adsorbent = 15 mg, MB = 100 mg L<sup>-1</sup>, 500 rpm, 30°C, 180 min.
